# Supplementary material for: Discovery of Bacteroides uniformis F18-22 as a Safe and Novel Probiotic Bacterium for the Treatment of Ulcerative Colitis from the Healthy Human Colon
Source: MDPI journal article supplement (doi:10.3390/ijms241914669), 2023-09-28
Supplement: s1 [file s1]

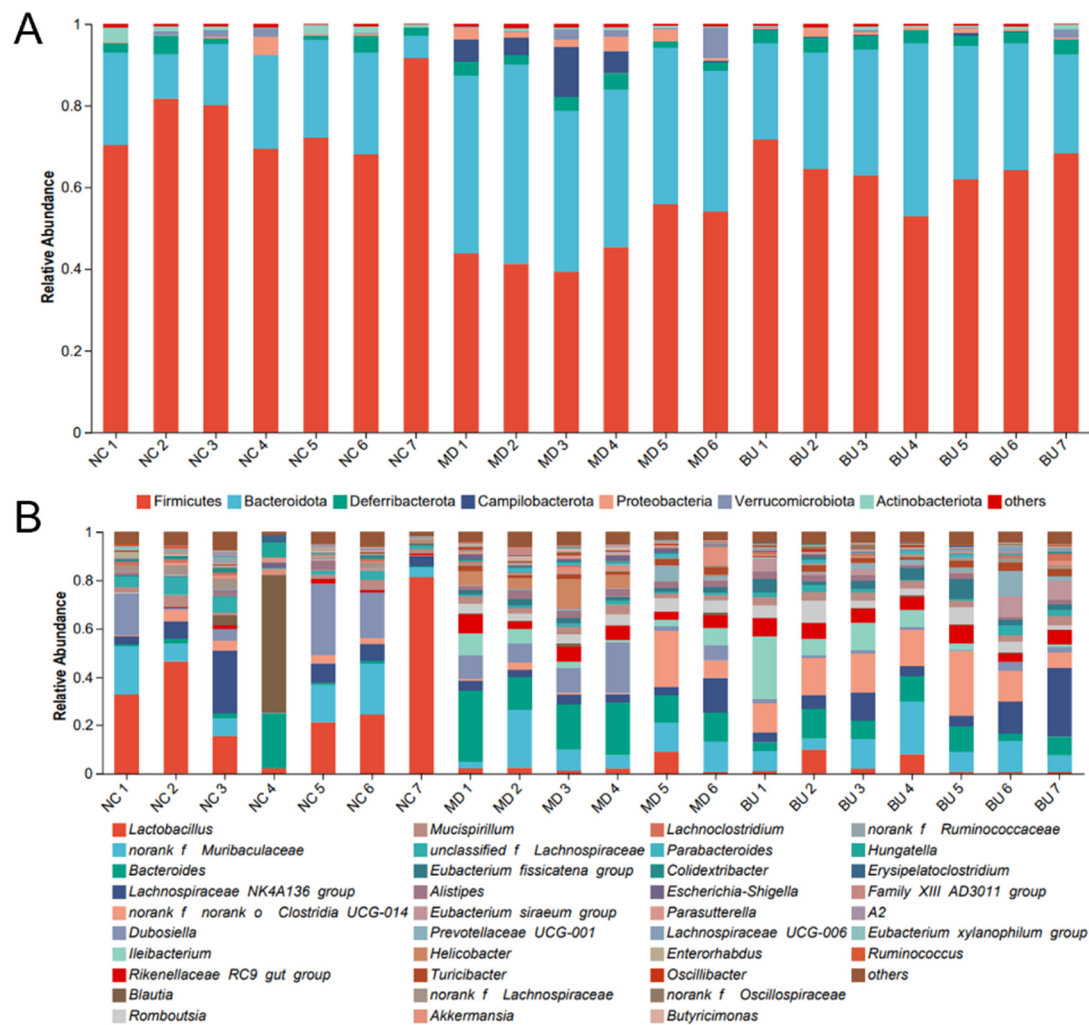

Figure S1. Composition of the gut microbiota at the phylum level (A) and the genus level (B).

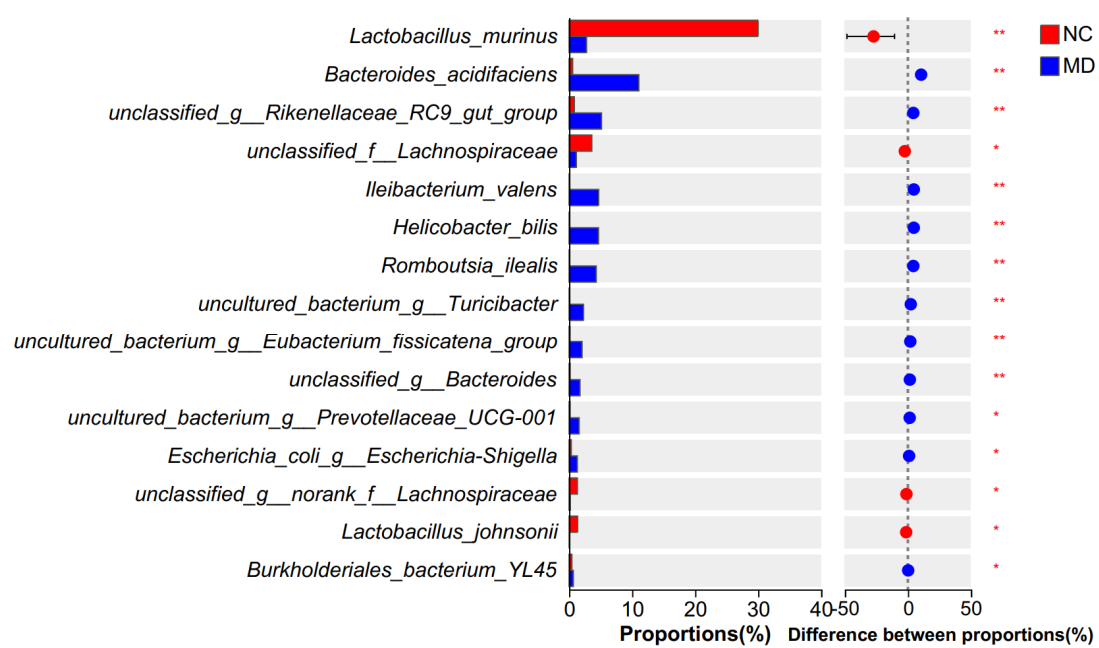

Figure S2. Wilcoxon rank-sum test analysis of the gut microbiota at the species level.
